# Supplementary material for: Facile synthesis of MXene-supported copper oxide nanocomposites for catalyzing the decomposition of ammonium perchlorate
Source: Royal Society of Chemistry journal article supplement (doi:10.1039/d0qi01337d), 2021-01-01
Supplement: d0qi01337d1.pdf [file d0qi01337d1.pdf]

## Supporting Information

### Facile Synthesis of MXene-Supported Copper oxide Nanocomposite for Catalyzing Decomposition of Ammonium Perchlorate

Keding Li<sup>a,b</sup>, Yuqing Lei<sup>a</sup>, Jun Liao<sup>a</sup>, Yong Zhang<sup>a,b\*</sup>

<sup>a</sup> State Key Laboratory of Environmental Friendly Energy Materials & School of National Defence Science and Technology, Southwest University of Science and Technology, Mianyang 621010, P. R. China

<sup>b</sup> Sichuan Co-Innovation Center for New Energetic Materials, Southwest University of Science and Technology, Mianyang 621010, P. R. China

\*Corresponding author. E-mail: pandmzy@foxmail.com.

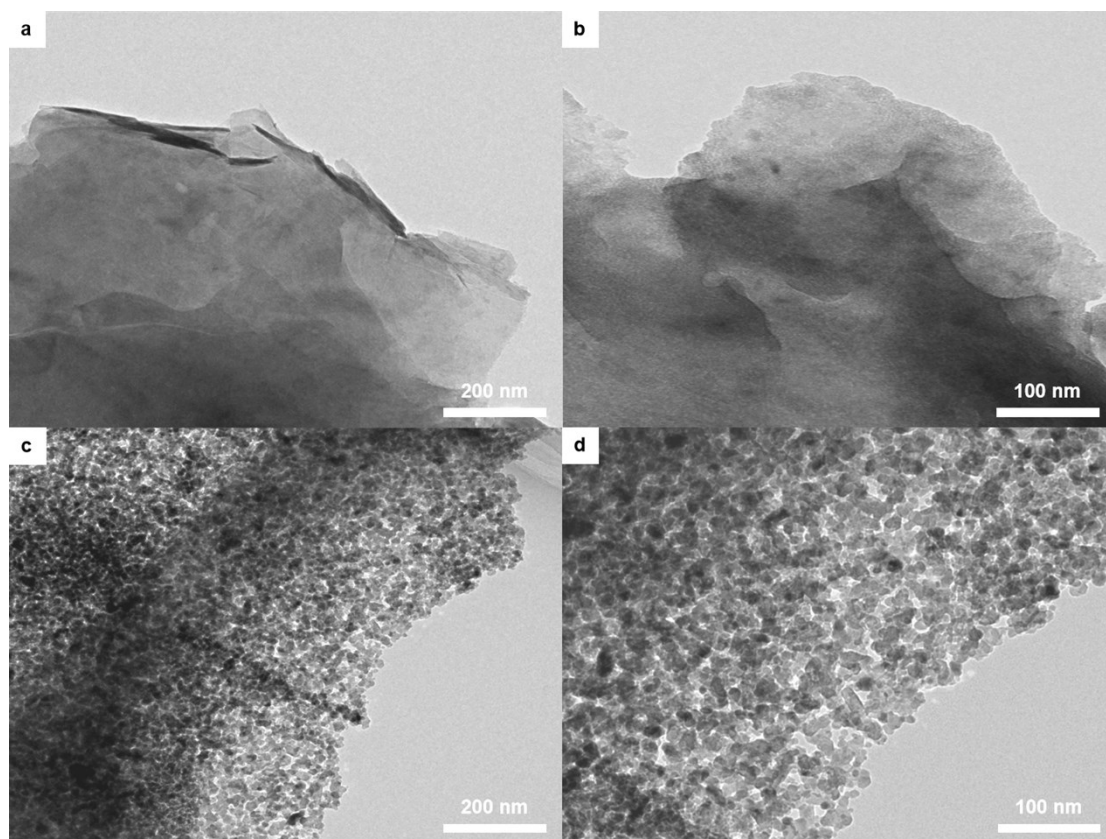

Figure S1. TEM images of pure MXene (a-b) and MCNs-3 (c-d).

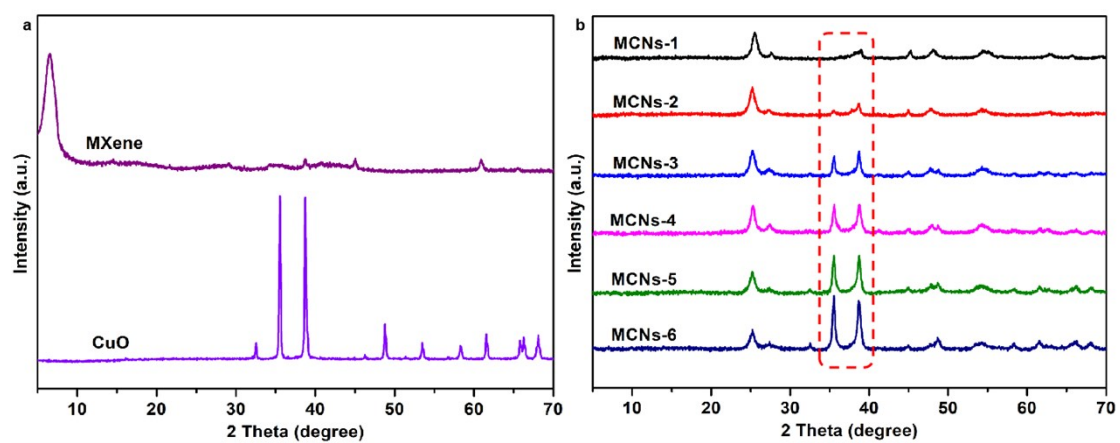

Figure S2. XRD spectra of (a) bare MXene and pure CuO, and (b) MCNs (MCNs-1, MCNs-2, MCNs-3, MCNs-4, MCNs-5, MCNs-6).

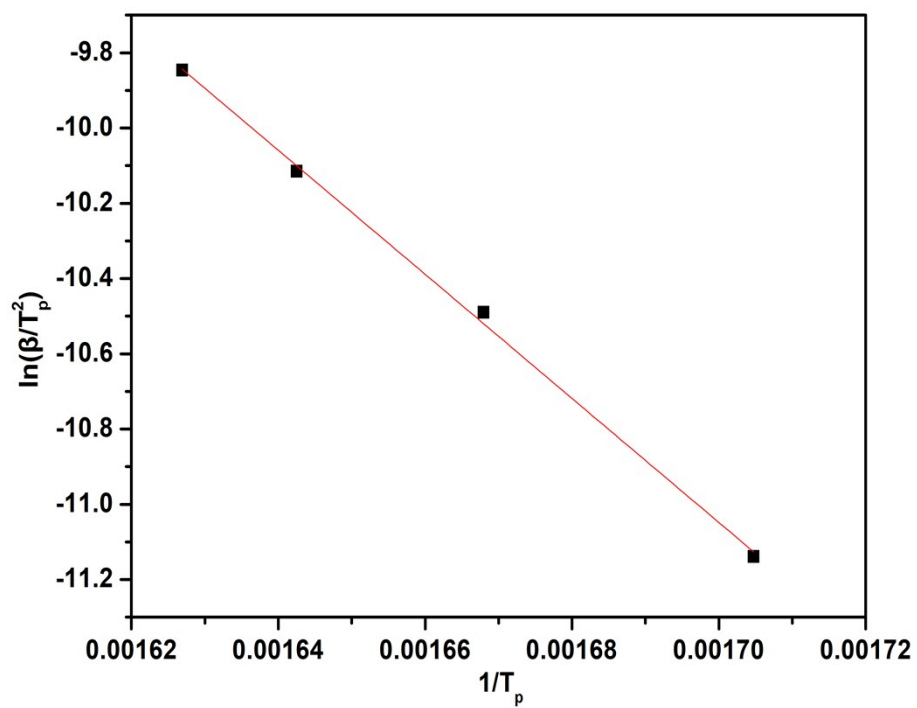

Figure S3. The dependence of  $\ln(\beta/T_p^2)$  on  $1/T_p$  for AP in the presence of 2 wt% MCNs-3 after Fraser-Suzuki function fitting.

Table S1. Specific surface area and average pore diameter of bare MXene, pure CuO and MCNs.

| Sample | Specific surface area/(m <sup>2</sup> ·g <sup>-1</sup> ) | Average pore diameter/nm |
|--------|----------------------------------------------------------|--------------------------|
| MXene  | 18.3                                                     | 69.7                     |
| CuO    | 20.1                                                     | 34.5                     |
| MCNs-1 | 32.9                                                     | 5.0                      |
| MCNs-2 | 37.2                                                     | 5.8                      |
| MCNs-3 | 56.1                                                     | 8.1                      |
| MCNs-4 | 47.2                                                     | 7.6                      |
| MCNs-5 | 45.5                                                     | 7.3                      |
| MCNs-6 | 39.9                                                     | 6.8                      |

Table S2. The kinetic parameters of pure AP and AP in the presence of 2 wt% MCNs-3 by Kissinger Akahira Sunose methods. ( $T_{\text{HTD}}$  was the Celsius temperature corresponding to  $T_p$ )

| $\beta$ (K·min <sup>-1</sup> ) | Pure AP                  |           |                    |         | AP with 2 wt% MCNs-3     |           |                    |         |
|--------------------------------|--------------------------|-----------|--------------------|---------|--------------------------|-----------|--------------------|---------|
|                                | $T_{\text{HTD}}$<br>(°C) | $T_p$ (K) | $\ln(\beta/T_p^2)$ | $1/T_p$ | $T_{\text{HTD}}$<br>(°C) | $T_p$ (K) | $\ln(\beta/T_p^2)$ | $1/T_p$ |
| 5.0                            | 417.6                    | 690.75    | -11.466            | 0.00145 | 312.6                    | 585.75    | -11.136            | 0.00171 |
| 10.0                           | 425.2                    | 698.35    | -10.795            | 0.00143 | 324.9                    | 598.05    | -10.485            | 0.00167 |
| 15.0                           | 434.1                    | 707.25    | -10.415            | 0.00141 | 336.9                    | 610.05    | -10.119            | 0.00164 |
| 20.0                           | 441.6                    | 714.75    | -10.148            | 0.00140 | 341.0                    | 614.15    | -9.845             | 0.00163 |

Table S3. Fitting parameters obtained by peak fitting of experimental DSC curves of AP in the presence of 2 wt% MCNs-3 at the different heating rate.

| Parameters | $\beta$ | $a_0$ | $a_1$  | $a_2$ | $a_3$  | $R^2$ |
|------------|---------|-------|--------|-------|--------|-------|
| Process 1  | 5.0     | 1.68  | 566.22 | 18.57 | -0.767 | 0.984 |
|            | 10.0    | 1.98  | 575.94 | 19.62 | -0.766 | 0.991 |
|            | 15.0    | 3.56  | 586.76 | 22.86 | -0.766 | 0.989 |
|            | 20.0    | 5.35  | 598.36 | 23.65 | -0.768 | 0.981 |
| Process 2  | 5.0     | 4.96  | 586.60 | 16.01 | -0.587 | 0.984 |
|            | 10.0    | 6.40  | 599.54 | 17.84 | -0.588 | 0.991 |
|            | 15.0    | 9.24  | 608.83 | 11.20 | -0.588 | 0.989 |
|            | 20.0    | 12.27 | 614.65 | 10.86 | -0.586 | 0.981 |

Table S4. The kinetic parameters of AP in the presence of 2 wt% MCNs-3 by Kissinger Akahira Sunose methods after Fraser-Suzuki function fitting. ( $T_{\text{HTD}}$  was the celsius temperature corresponding to  $T_p$ )

| $\beta$ (K·min <sup>-1</sup> ) | AP with 2 wt% MCNs-3  |           |                    |         |                               |       |
|--------------------------------|-----------------------|-----------|--------------------|---------|-------------------------------|-------|
|                                | $T_{\text{HTD}}$ (°C) | $T_p$ (K) | $\ln(\beta/T_p^2)$ | $1/T_p$ | $E_a$ (kJ·mol <sup>-1</sup> ) | $R^2$ |
| 5.0                            | 313.5                 | 586.65    | -11.139            | 0.00170 | 137.1                         | 0.997 |
| 10.0                           | 326.4                 | 599.55    | -10.490            | 0.00167 |                               |       |
| 15.0                           | 335.7                 | 608.85    | -10.115            | 0.00164 |                               |       |
| 20.0                           | 341.5                 | 614.65    | -9.846             | 0.00163 |                               |       |
